# Supplementary material for: Measuring, simulating and optimizing current LED phosphor systems to enhance the visual quality of lighting
Source: Springer Nature journal article supplement (doi:10.1186/2196-1107-1-5), 2014-01-01

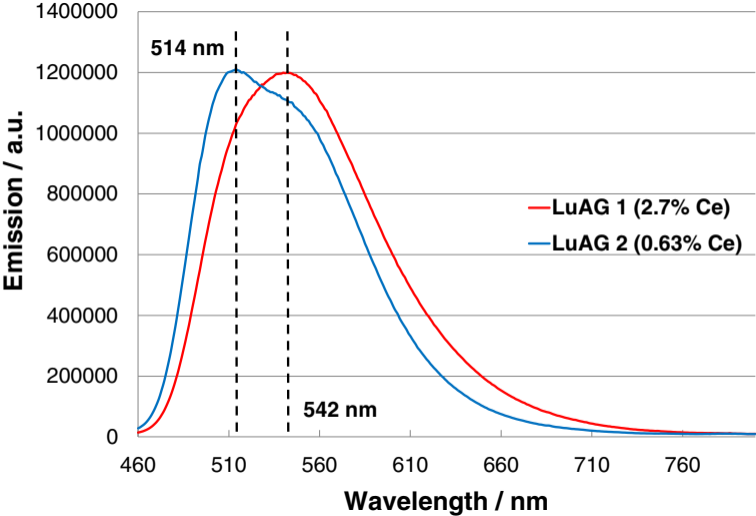

Supplement: 40539_2013_5_MOESM6_ESM.pdf [file 40539_2013_5_MOESM6_ESM.pdf]
